# Supplementary material
Source: PubMed Central journal article supplement (PMC3630802)
Supplement: NIHMS449962-supplement-Supplementary_Material.pdf [file NIHMS449962-supplement-Supplementary_Material.pdf]

# Supplementary Material for *Deconvolution When Classifying Noisy Data Involving Transformations*

Raymond Carroll

Department of Statistics, Texas A&M University, College Station, Texas 77843-3143, USA  
carroll@stat.tamu.edu

Aurore Delaigle

Department of Mathematics and Statistics, University of Melbourne, VIC, 3010, Australia  
A.Delaigle@ms.unimelb.edu.au

Peter Hall

Department of Mathematics and Statistics, University of Melbourne, VIC, 3010, Australia  
halpstat@ms.unimelb.edu.au

## A Supplement to Numerical Implementation

### A.1 Breaking ties for the centroid classifier

In cases where  $\hat{e}(\theta)$  achieves its minimum at several values  $\theta$ , we break the ties by choosing  $\theta$  to minimize

$$\begin{aligned} & -\frac{\pi_1}{n_1 \cdot M(\theta)} \sum_{i=1}^{n_1} S_{\theta; -i1}(Y_{i1}) I\{S_{\theta; -i1}(Y_{i1}) \leq 0\} \\ & + \frac{1 - \pi_1}{n_2 \cdot M(\theta)} \sum_{i=1}^{n_2} S_{\theta; -i2}(Y_{i2}) I\{S_{\theta; -i2}(Y_{i2}) > 0\} \end{aligned}$$

over  $\theta$  for which  $\hat{e}(\theta)$  is tied at the least value it takes. Here,  $M(\theta)$  is a normalizing factor defined by  $M(\theta) = \max_{j=1,2} n_j^{-1} \sum_{i=1}^{n_j} \sum_{r \in \mathcal{D}} |Z_{ij;\theta}(r) - \bar{Z}_j^{(-i)}(r; \theta)|^2$ .

### A.2 Other choices of spread function $\omega_{Q_\theta}$

Alternatives to the two-parameter family  $\omega_{p_0; \theta}$  introduced in Section 2.3 include taking  $\omega_{Q_\theta}$  to have relatively narrow support, and choosing the weights  $\omega_{Q_\theta}(r)$  to be small in number, for example to equal  $\theta_j$  if  $c_{j-1} < \|r\| \leq c_j$  for  $1 \leq j \leq q$  and  $r \in \mathbb{Z}^d$ , and to equal 0 otherwise. Here,  $\|r\|^2 = \sum_{1 \leq j \leq d} r_j^2$ ,  $0 = c_0 < c_1 < \dots < c_q$  are constants,  $\theta_1 \geq \dots \geq \theta_q > 0$ , and the weights would usually be normalized so that  $\sum_{r \in \mathbb{Z}^d} \omega_{Q_\theta}(r) = 1$ .

**Remark 1.** In some instances we may have in mind a choice of models for  $Q_\theta$ , potentially with different values,  $q$ , of the length of  $\theta$ . We can choose among models, including among

Table 1: Values of  $\sigma$ ,  $\theta_R$  and signal to noise ratio for models (a) and (b)

| Model (a)                     |        |        |        |        |        |        |        |        |        |
|-------------------------------|--------|--------|--------|--------|--------|--------|--------|--------|--------|
| $\rho_R$                      | 0.75   | 0.5    | 0.25   | 0.75   | 0.5    | 0.25   | 0.75   | 0.5    | 0.25   |
| $\ell_R$                      | 3      | 3      | 3      | 2      | 2      | 2      | 1      | 1      | 1      |
| $\sigma$                      | 5      | 1      | 1      | 2      | 1      | 1      | 1      | 1      | .8     |
| SNR ( $k_{\mathcal{I}} = 1$ ) | 0.5682 | 1.8097 | 1.2231 | 1.2600 | 1.6007 | 1.0687 | 1.9844 | 1.2450 | 1.0484 |
| SNR ( $k_{\mathcal{I}} = 2$ ) | 0.4187 | 1.3304 | 0.8329 | 0.9278 | 1.1539 | 0.6645 | 1.4082 | 0.7867 | 0.5793 |
| Model (b)                     |        |        |        |        |        |        |        |        |        |
| $\rho_R$                      | 0.75   | 0.5    | 0.25   | 0.75   | 0.5    | 0.25   | 0.75   | 0.5    | 0.25   |
| $\ell_R$                      | 3      | 3      | 3      | 2      | 2      | 2      | 1      | 1      | 1      |
| $\sigma$                      | 1      | 0.5    | 0.5    | 1      | 0.5    | 0.25   | 0.5    | 0.5    | 0.25   |
| SNR ( $k_{\mathcal{I}} = 1$ ) | 1.6122 | 2.0540 | 1.3882 | 1.4300 | 1.8167 | 2.4258 | 2.2523 | 1.4130 | 1.9039 |
| SNR ( $k_{\mathcal{I}} = 2$ ) | 1.9603 | 2.4915 | 1.5599 | 1.7376 | 2.1610 | 2.4888 | 2.6372 | 1.4733 | 1.7359 |

values of  $q$ , by using crossvalidation to assess the impact that this choice has on classification error, or by using Monte Carlo simulation from models that seem to mimic the data well.

### A.3 Complements to numerical section

#### A.3.1 Signal to noise ratio

For each example, we calculated a signal to noise ratio SNR, which we defined as

$$\text{SNR} = \max_{r \in \mathcal{D}} \frac{|T\{\mu_2(r) - \mu_1(r)\}|}{\sqrt{\text{var}\{R\xi(r)\}}}. \quad (\text{A.1})$$

The values of SNR are shown in Tables 1 to 3 for each example considered in our numerical work.

#### A.3.2 Additional figures for Section 4.3.3

Here we show additional results obtained when applying to inversion method to the centroid classifier when the errors  $R_r \xi_{ij}(r)$  were non stationary. As in Section 4.3.3, we inverted the data through  $Q_{\hat{\theta}_{CV}}^{-1}$ . Figures 1 and 2 show boxplots of the percentage of missclassified curves for the centroid classifier constructed from the data  $Q_{\hat{\theta}_{CV}}^{-1} Y_{ij}$ ,  $Y_{ij}$  and  $T^{-1}Y_{ij}$ , where  $Y_{ij}$  was generated as in (4.5), with,  $\mu_j$  from model (a) and model (b), respectively,  $R_r$  as in (4.6) and  $\alpha = 10$ .

Table 2: Values of  $\sigma$ ,  $\theta_R$  and signal to noise ratio for models (c) and (d)

| Model (c)                     |        |        |        |        |        |        |
|-------------------------------|--------|--------|--------|--------|--------|--------|
| $\rho_R$                      | 0.85   | 0.5    | 0.85   | 0.5    | 0.85   | 0.5    |
| $\ell_R$                      | 3      | 3      | 2      | 2      | 1      | 1      |
| $\sigma$                      | 5      | 1      | 5      | 1      | 2      | .5     |
| SNR ( $k_{\mathcal{I}} = 1$ ) | 1.5615 | 1.7838 | 1.2291 | 1.3955 | 1.9155 | 1.6884 |
| SNR ( $k_{\mathcal{I}} = 2$ ) | 1.3669 | 1.5540 | 1.0758 | 1.1690 | 1.6344 | 1.0868 |
| Model (d)                     |        |        |        |        |        |        |
| $\rho_R$                      | 0.85   | 0.5    | 0.85   | 0.5    | 0.85   | 0.5    |
| $\ell_R$                      | 3      | 3      | 2      | 2      | 1      | 1      |
| $\sigma$                      | 2      | 1      | 2      | 0.5    | 1      | .5     |
| SNR ( $k_{\mathcal{I}} = 1$ ) | 0.6401 | 0.2925 | 0.5039 | 0.4577 | 0.6282 | 0.2769 |
| SNR ( $k_{\mathcal{I}} = 2$ ) | 0.6101 | 0.2775 | 0.4802 | 0.4174 | 0.5836 | 0.1940 |

Table 3: Values of  $\sigma$ ,  $\theta_M$  and signal to noise ratio for models (c) and (d)

| Model (c)                     |        |        |        |
|-------------------------------|--------|--------|--------|
| $\theta_M$                    | 30     | 20     | 10     |
| $\sigma$                      | 5      | 2.5    | 1      |
| SNR ( $k_{\mathcal{I}} = 1$ ) | 1.4531 | 1.9676 | 2.5689 |
| SNR ( $k_{\mathcal{I}} = 2$ ) | 0.3182 | 0.4311 | 0.5645 |
| Model (d)                     |        |        |        |
| $\theta_M$                    | 30     | 20     | 10     |
| $\sigma$                      | 2.5    | 1      | 1      |
| SNR ( $k_{\mathcal{I}} = 1$ ) | 0.4766 | 0.8066 | 0.4213 |
| SNR ( $k_{\mathcal{I}} = 2$ ) | 0.1136 | 0.1924 | 0.1008 |

Figure 3 shows similar results for the bivariate examples (c) and (d), when the data were generated according to (4.5) with  $R_r$  as in (4.7) and  $\alpha = 4$ . These results are similar to those discussed in Section 4.3.3 of the paper.

### A.3.3 Logistic classifier based on PLS projection

Let  $I_{ij} = j - 1$ , where  $Y_{ij}$  comes from population  $\Pi_j$ , with  $j = 1$  or  $2$ , and let  $D_{ij}$  denote one of the four versions of the observations that we use to construct our classifiers (i.e.,  $D_{ij}$  denotes any of  $Y_{ij}$ ,  $T^{-1}Y_{ij}$ ,  $R^{-1}Y_{ij}$  or  $\widehat{Q}^{-1}Y_{ij}$ ). The PLS logistic classifier assumes that the regression

$$g(x) = E(I_{ij} \mid D_{ij} = x)$$

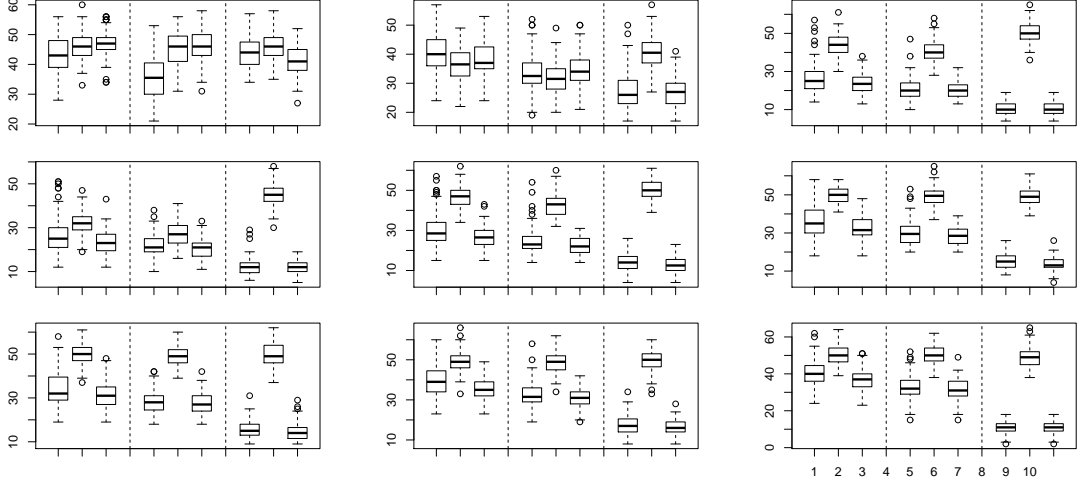

Figure 1: Boxplots of percentage of misclassified observations calculated from 100 simulated samples from model (a) when  $\theta_R = (\rho_{R,r}, \ell_R)$ , with  $\rho_{R,r} = \rho_R + 0.1 \cos(r/10)$ ,  $\rho_R = 0.75, 0.5$  and  $0.25$  in rows 1, 2 and 3, respectively, and  $\ell_R = 3, 2$  and  $1$  in columns 1, 2 and 3, respectively. In each group of 9 boxes, the first three are for  $n_1 = n_2 = 10$  and  $k_{\mathcal{I}} = 2$ , the next three are for  $n_1 = n_2 = 25$  and  $k_{\mathcal{I}} = 2$ , and the last three are for  $n_1 = n_2 = 25$  and  $k_{\mathcal{I}} = 1$ . In each group of three boxes, the data are transformed by  $\hat{Q}^{-1}$  (first box),  $T^{-1}$  (second box), or untransformed (third box).

follows a logistic model,

$$g(x) = \frac{\exp(\alpha_0 + \alpha_1 \int_{\mathcal{D}} x\beta)}{1 + \exp(\alpha_0 + \alpha_1 \int_{\mathcal{D}} x\beta)}, \quad (\text{A.2})$$

where  $\alpha_0$  and  $\alpha_1 \in \mathbb{R}$  and  $\beta$  is a function defined on  $\mathcal{D}$ . With the PLS approach,  $\beta$  is taken equal to the slope,  $\beta$ , of the linear approximation  $\beta_0 + \int_{\mathcal{D}} \beta D_{ij}$  to the regression function  $E(I_{ij} \mid D_{ij})$ . Then,  $\beta$  is estimated by the estimator  $\hat{\beta}$  obtained by PLS (see Delaigle and Hall (2012a,b) for details about the PLS estimator), and  $\alpha_0$  and  $\alpha_1$  are estimated by  $\hat{\alpha}_0$  and  $\hat{\alpha}_1$ , obtained by a least-squares fit of  $I_{ij}$  on  $\int_{\mathcal{D}} D_{ij} \hat{\beta}$ , using the logistic model (A.2) with  $\beta$  replaced by  $\hat{\beta}$ .

The regression function  $g$  is then estimated by

$$\hat{g}(x) = \frac{\exp(\hat{\alpha}_0 + \hat{\alpha}_1 \int_{\mathcal{D}} x\hat{\beta})}{1 + \exp(\hat{\alpha}_0 + \hat{\alpha}_1 \int_{\mathcal{D}} x\hat{\beta})},$$

and the classifier assigns a new data function  $D$  to population  $\Pi_1$  if  $\hat{g}(D) < 0.5$  and to population  $\Pi_2$  otherwise. The partial least-squares slope estimator  $\hat{\beta}$  depends on a smoothing parameter  $m$ , which is the number of PLS basis functions employed to calculate  $\hat{\beta}$ . This  $m$  is chosen by crossvalidation, together with  $\theta$ .

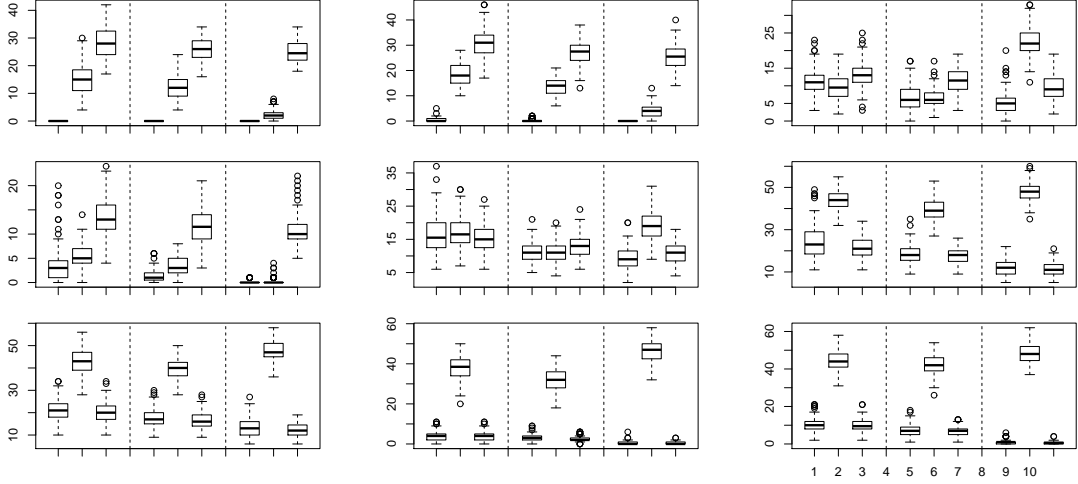

Figure 2: Boxplots of percentage of misclassified observations calculated from 100 simulated samples from model (b) when  $\theta_R = (\rho_{R,r}, \ell_R)$ , with  $\rho_{R,r} = \rho_R + 0.1 \cos(r/10)$ ,  $\rho_R = 0.75, 0.5$  and  $0.25$  in rows 1, 2 and 3, respectively, and  $\ell_R = 3, 2$  and  $1$  in columns 1, 2 and 3, respectively. In each group of 9 boxes, the first three are for  $n_1 = n_2 = 10$  and  $k_{\mathcal{I}} = 2$ , the next three are for  $n_1 = n_2 = 25$  and  $k_{\mathcal{I}} = 2$ , and the last three are for  $n_1 = n_2 = 25$  and  $k_{\mathcal{I}} = 1$ . In each group of three boxes, the data are transformed by  $\hat{Q}^{-1}$  (first box),  $T^{-1}$  (second box), or untransformed (third box).

### A.3.4 Simulation results for unbalanced samples

We also applied the centroid classifier to unbalanced training samples. The results for models (a) and (b), with  $n_1 = 10, n_2 = 25$  and  $k_{\mathcal{I}} = 1$  or  $k_{\mathcal{I}} = 2$ , are shown in Figures 4 and 5. We can see that the results are similar to those we obtained when  $n_1 = n_2$ .

### A.3.5 Simulation results for other classifiers

We applied the SVM classifier and the logistic PLS classifier to each of the four versions of the data: the untransformed noisy data  $Y_i^{\text{New}}$ , the data  $T^{-1}Y_i^{\text{New}}$ , the data  $\hat{Q}^{-1}Y_i^{\text{New}}$  and the data  $R^{-1}Y_i^{\text{New}}$ . We used the same simulation settings as in Section 4 (same models, same values of  $\theta_R$  and  $\theta_T$ , same training and test sample sizes, etc), and as in Section 4 we report the results of our simulations by showing boxplots of the number of observations misclassified by each classifier, for each version of the data. In the case  $\hat{Q}^{-1}Y_i^{\text{New}}$  we chose  $\theta$  by minimizing the crossvalidation criterion defined in (2.12), taking  $\mathcal{C}$  to be the SVM classifier or the logistic PLS classifier. In case of ties for the SVM classifier, we took the smallest value of  $\rho$  and  $\theta$  that minimize crossvalidation. For the logistic classifier, we broke the ties using the method suggested in Delaigle and Hall (2012b).

Figures 6 to 9 show the results for the SVM classifier, for models (a) to (d), training

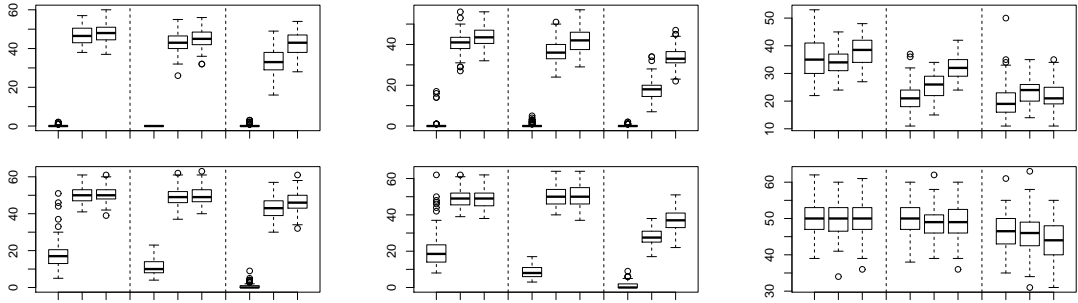

Figure 3: Boxplots of percentage of misclassified observations calculated from 100 simulated samples from models (c) (row 1) and (d) (rows 2) when  $R_r$  is of the form at (4.7), with  $\theta_{M,r_j} = \theta_M + 2 \cdot [4 \cos(r_j/2)]$  and  $\theta_M = 30, 20$  and  $10$  in columns 1, 2 and 3, respectively. In each group of 9 boxes, the first three are for  $n_1 = n_2 = 10$  and  $k_{\mathcal{I}} = 2$ , the next three are for  $n_1 = n_2 = 25$  and  $k_{\mathcal{I}} = 2$ , and the last three are for  $n_1 = n_2 = 25$  and  $k_{\mathcal{I}} = 1$ . In each group of three boxes, the data are transformed by  $\hat{Q}^{-1}$  (first box),  $T^{-1}$  (second box), or untransformed (third box).

sample sizes  $n_1 = n_2 = 10$  or  $n_1 = n_2 = 25$ , and when the grid  $\mathcal{D}$  has edge width  $k_{\mathcal{I}} = 1$  or  $k_{\mathcal{I}} = 2$ . Figures 10 and 11 show the results for the logistic classifier, for models (a) and (b) for training samples of sizes  $n_1 = n_2 = 10$  or  $n_1 = n_2 = 25$ , and when the grid  $\mathcal{D}$  has edge width  $k_{\mathcal{I}} = 2$ .

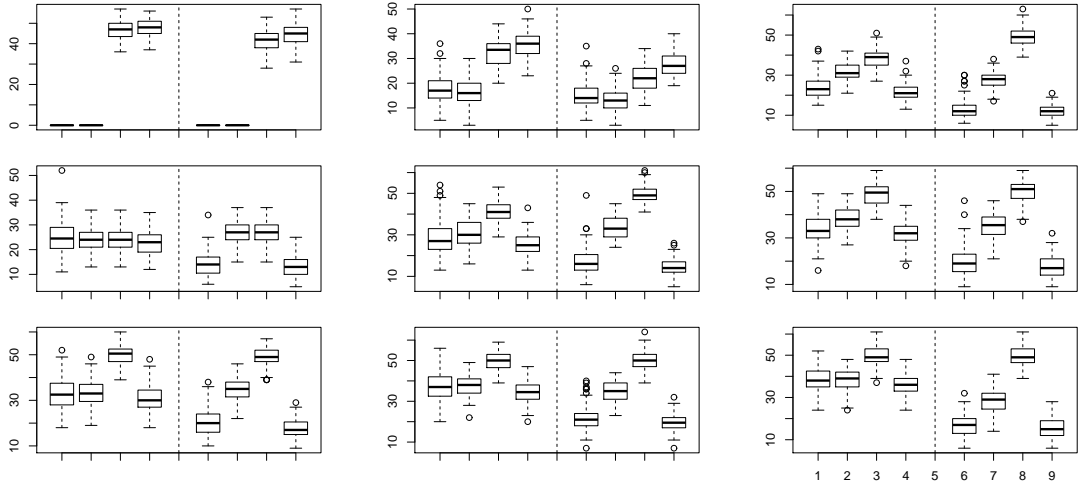

Figure 4: Boxplots of percentage of misclassified observations calculated from 100 simulated samples from model (a) when  $\theta_R = (\rho_R, \ell_R)$ , with  $\rho_R = 0.75, 0.5$  and  $0.25$  in rows 1, 2 and 3, respectively, and  $\ell_R = 3, 2$  and  $1$  in columns 1, 2 and 3, respectively. In each group of 8 boxes, the first four are for  $n_1 = 10, n_2 = 25$  and  $k_{\mathcal{I}} = 2$ , and the next four are for  $n_1 = 10, n_2 = 25$  and  $k_{\mathcal{I}} = 1$ . In each group of four boxes, the data are transformed by  $\hat{Q}^{-1}$  (first box),  $R^{-1}$  (second box),  $T^{-1}$  (third box), or untransformed (fourth box).

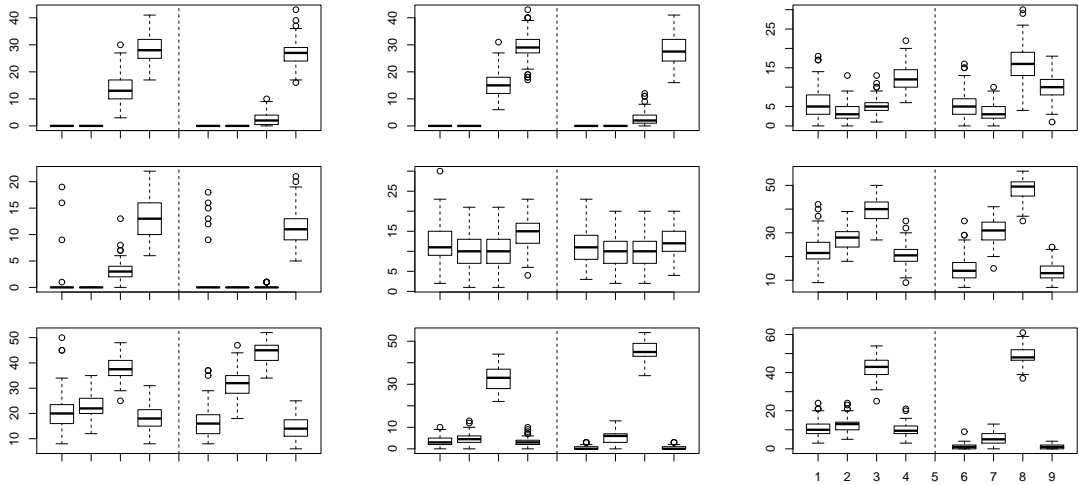

Figure 5: Boxplots of percentage of misclassified observations calculated from 100 simulated samples from model (b) when  $\theta_R = (\rho_R, \ell_R)$ , with  $\rho_R = 0.75, 0.5$  and  $0.25$  in rows 1, 2 and 3, respectively, and  $\ell_R = 3, 2$  and  $1$  in columns 1, 2 and 3, respectively. In each group of 8 boxes, the first four are for  $n_1 = 10, n_2 = 25$  and  $k_{\mathcal{I}} = 2$ , and the next four are for  $n_1 = 10, n_2 = 25$  and  $k_{\mathcal{I}} = 1$ . In each group of four boxes, the data are transformed by  $\hat{Q}^{-1}$  (first box),  $R^{-1}$  (second box),  $T^{-1}$  (third box), or untransformed (fourth box).

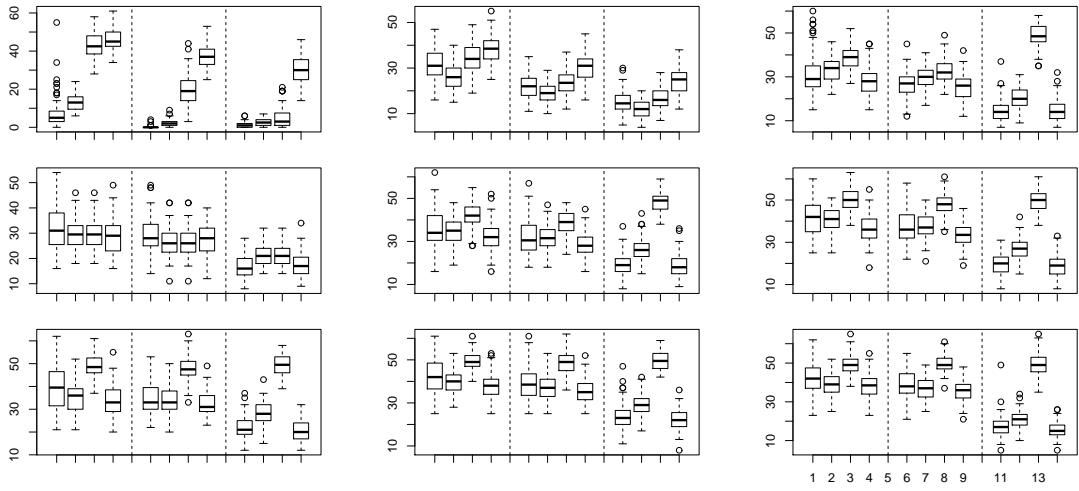

Figure 6: Boxplots of percentage of observations misclassified by the SVM classifier, calculated from 100 simulated samples from model (a) when  $\theta_R = (\rho_R, \ell_R)$ , with  $\rho_R = 0.75, 0.5$  and  $0.25$  in rows 1, 2 and 3, respectively, and  $\ell_R = 3, 2$  and  $1$  in columns 1, 2 and 3, respectively. In each group of 12 boxes, the first four are for  $n_1 = n_2 = 10$  and  $k_{\mathcal{I}} = 2$ , the next four are for  $n_1 = n_2 = 25$  and  $k_{\mathcal{I}} = 2$ , and the last four are for  $n_1 = n_2 = 25$  and  $k_{\mathcal{I}} = 1$ . In each group of four boxes, the data are transformed by  $\hat{Q}^{-1}$  (first box),  $R^{-1}$  (second box),  $T^{-1}$  (third box), or untransformed (fourth box).

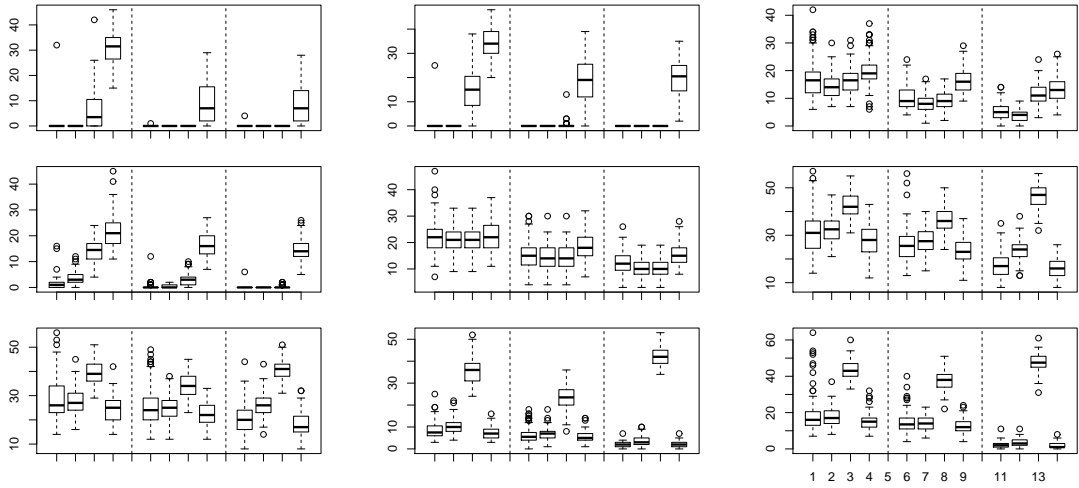

Figure 7: Boxplots of percentage of observations misclassified by the SVM classifier, calculated from 100 simulated samples from model (b) when  $\theta_R = (\rho_R, \ell_R)$ , with  $\rho_R = 0.75, 0.5$  and  $0.25$  in rows 1, 2 and 3, respectively, and  $\ell_R = 3, 2$  and  $1$  in columns 1, 2 and 3, respectively. In each group of 12 boxes, the first four are for  $n_1 = n_2 = 10$  and  $k_{\mathcal{I}} = 2$ , the next four are for  $n_1 = n_2 = 25$  and  $k_{\mathcal{I}} = 2$ , and the last four are for  $n_1 = n_2 = 25$  and  $k_{\mathcal{I}} = 1$ . In each group of four boxes, the data are transformed by  $\hat{Q}^{-1}$  (first box),  $R^{-1}$  (second box),  $T^{-1}$  (third box), or untransformed (fourth box).



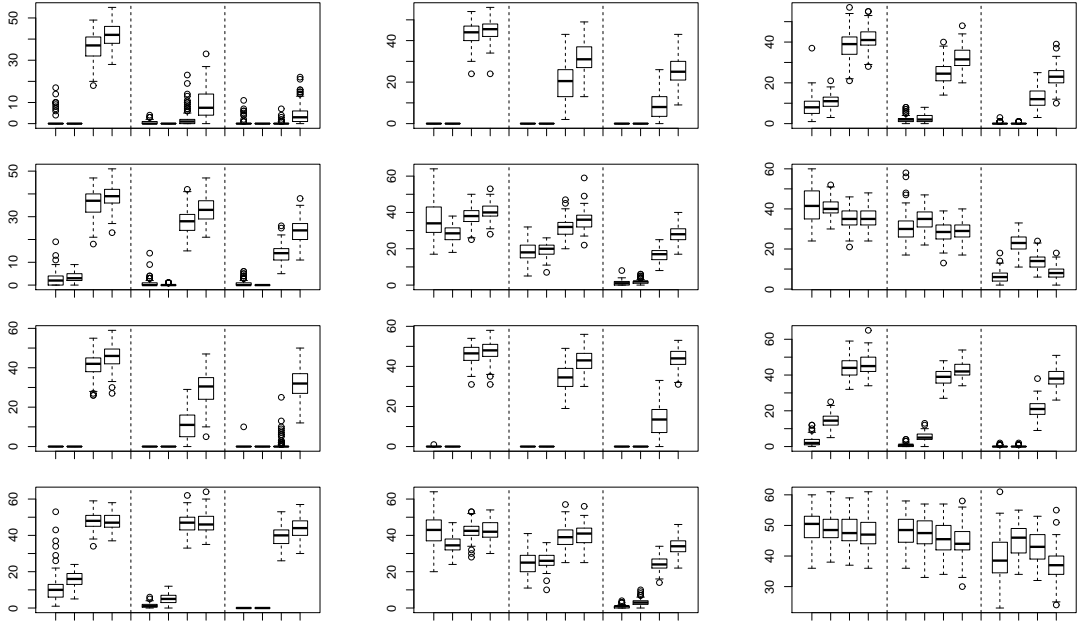

Figure 8: Boxplots of percentage of observations misclassified by the SVM classifier, calculated from 100 simulated samples from models (c) (rows 1 and 2) and (d) (rows 3 and 4) when  $\theta_R = (\rho_R, \ell_R)$ , with  $\rho_R = 0.85$  and  $0.5$  in rows 1,3 and 2,4 respectively, and  $\ell_R = 3, 2$  and  $1$  in columns 1, 2 and 3, respectively. In each group of 12 boxes, the first four are for  $n_1 = n_2 = 10$  and  $k_{\mathcal{I}} = 2$ , the next four are for  $n_1 = n_2 = 25$  and  $k_{\mathcal{I}} = 2$ , and the last four are for  $n_1 = n_2 = 25$  and  $k_{\mathcal{I}} = 1$ . In each group of four boxes, the data are transformed by  $\widehat{Q}^{-1}$  (first box),  $R^{-1}$  (second box),  $T^{-1}$  (third box), or untransformed (fourth box).

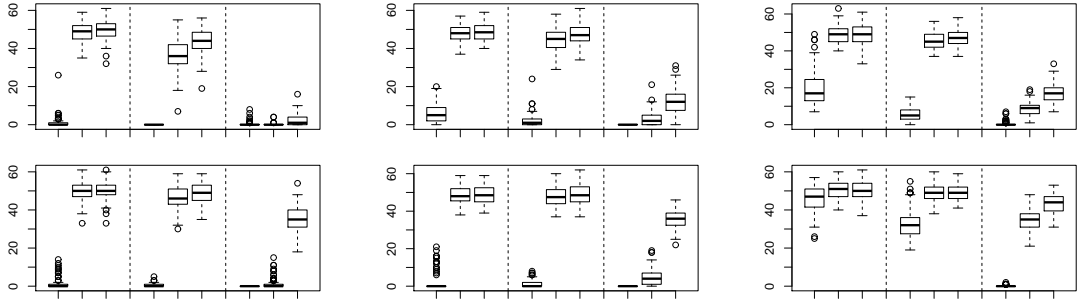

Figure 9: Boxplots of percentage of observations misclassified by the SVM classifier, calculated from 100 simulated samples from models (c) (row 1) and (d) (rows 2) when  $R$  is of the form at (4.3), with  $\theta_M = 30, 20$  and  $10$  in columns 1, 2 and 3, respectively. In each group of 9 boxes, the first three are for  $n_1 = n_2 = 10$  and  $k_{\mathcal{I}} = 2$ , the next three are for  $n_1 = n_2 = 25$  and  $k_{\mathcal{I}} = 2$ , and the last three are for  $n_1 = n_2 = 25$  and  $k_{\mathcal{I}} = 1$ . In each group of three boxes, the data are transformed by  $\widehat{Q}^{-1}$  (first box),  $T^{-1}$  (second box), or untransformed (third box).

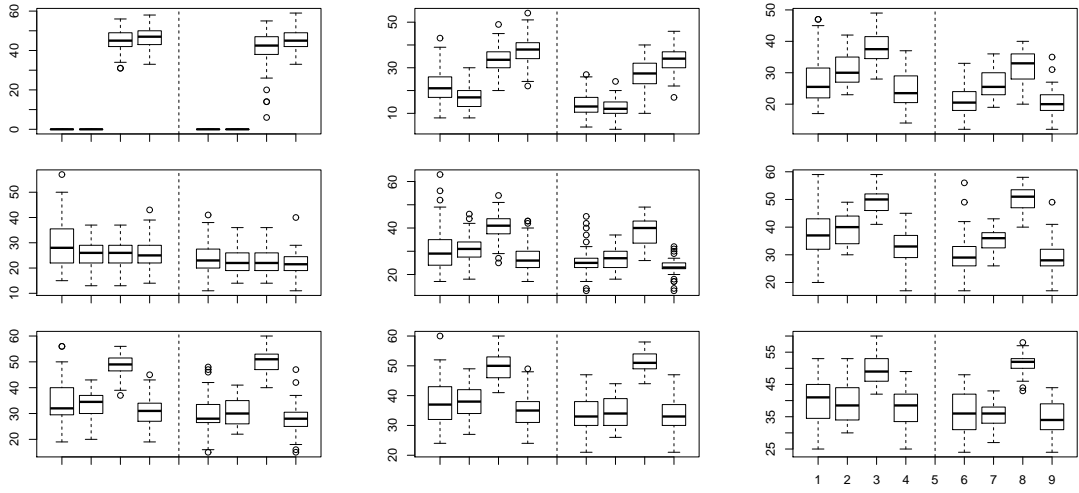

Figure 10: Boxplots of percentage of observations misclassified by the logistic classifier, calculated from 100 simulated samples from model (a) when  $\theta_R = (\rho_R, \ell_R)$ , with  $\rho_R = 0.75, 0.5$  and  $0.25$  in rows 1, 2 and 3, respectively, and  $\ell_R = 3, 2$  and  $1$  in columns 1, 2 and 3, respectively. In each group of 8 boxes, the first four are for  $n_1 = n_2 = 10$  and  $k_T = 2$ , and the next four are for  $n_1 = n_2 = 25$ . In each group of four boxes, the data are transformed by  $\hat{Q}^{-1}$  (first box),  $R^{-1}$  (second box),  $T^{-1}$  (third box), or untransformed (fourth box).

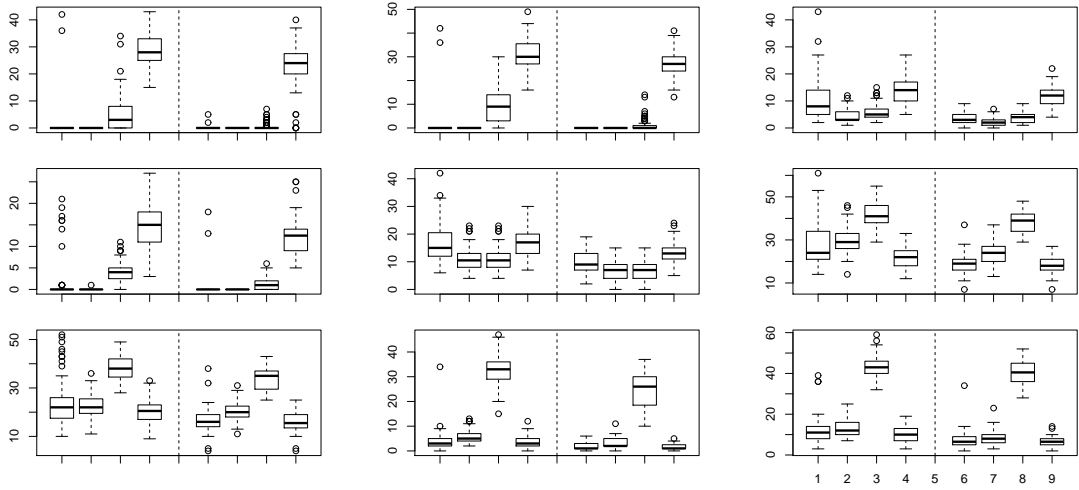

Figure 11: Boxplots of percentage of observations misclassified by the logistic classifier, calculated from 100 simulated samples from model (b) when  $\theta_R = (\rho_R, \ell_R)$ , with  $\rho_R = 0.75, 0.5$  and  $0.25$  in rows 1, 2 and 3, respectively, and  $\ell_R = 3, 2$  and  $1$  in columns 1, 2 and 3, respectively. In each group of 8 boxes, the first four are for  $n_1 = n_2 = 10$  and  $k_T = 2$ , and the next four are for  $n_1 = n_2 = 25$ . In each group of four boxes, the data are transformed by  $\hat{Q}^{-1}$  (first box),  $R^{-1}$  (second box),  $T^{-1}$  (third box), or untransformed (fourth box).

## B Technical Arguments

### B.1 Regularity conditions

We define

$$q = \int_{\mathcal{T}} |\phi_{\omega_R}|^4 \sup_{\theta \in \Theta} |\phi_{\omega_{Q\theta}}|^{-4}, \quad (\text{B.1})$$

where  $\mathcal{T}$  denotes a general subset of  $(-\pi, \pi)^d$ . We let  $\Theta$ , the class of values of the parameter  $\theta$  over which we search, be a compact set of vectors in a finite-dimensional Euclidean space. Below, the notation  $C_2, C_3, \dots$  and  $c_1, c_2, \dots$  will denote positive constants, large in the first instance and small in the second.

We assume that the white-noise variables  $\xi_j$  in (2.3) are such that:

$$\begin{aligned} & \text{(a) } \xi_j(r)/\sigma_n \text{ are independent and identically distributed with zero mean} \\ & \text{and unit variance, for } r \in \mathcal{D}, j = 1, 2 \text{ and all } n; \text{ (b) } E|\xi_j(r)/\sigma_n|^{C_1} < \infty, \end{aligned} \quad (\text{B.2})$$

where  $C_1 > 0$  is chosen sufficiently large, depending on  $c_1, c_2$  and  $c_4$ .

(The constants  $c_2$  and  $c_4$  are introduced in (B.5)(b) and (B.6)(b), respectively.) Property (B.2) requires that the noise variables be rescaled quantities with zero mean, unit variance and sufficiently many finite moments.

We also assume that the training sample sizes  $n_1$  and  $n_2$  satisfy:

$$n_1 \text{ and } n_2 \text{ are functions of } n, \text{ and for some } c_1 > 0, n^{c_1} \leq n_{\min} \equiv \min(n_1, n_2) \quad (\text{B.3})$$

for all  $n$ .

This condition is equivalent to asking that training sample sizes increase at least polynomially fast as functions of the number of points in the grid  $\mathcal{D}$ .

Recall that  $\#\mathcal{D} = (2n + 1)^d$  denotes the number of vertices in the lattice  $\mathcal{D}$ , defined at (3.4). We model the distance between  $T\mu_1$  and  $T\mu_2$  by asking that:

$$\begin{aligned} \phi_{T(\mu_1 - \mu_2)} &= \alpha_n \phi_{\omega_R} \phi_K, \text{ where } |K(r)| \leq C_2 \text{ for all } r \in \mathcal{D} \text{ and} \\ |\phi_K(t)| &\leq C_3 \#\mathcal{D} \text{ for all } t \in \mathcal{T}. \end{aligned} \quad (\text{B.4})$$

To understand this condition, it is helpful to interpret  $K(r)$  as the value of a function,  $\gamma$  say, supported on  $[-1, 1]$ , at the point  $r/n$ , where  $n$  diverges to infinity in our asymptotic model. Let  $\phi_\gamma(t)$  denote the continuous Fourier transform of  $\gamma$ , where  $t = (t_1, \dots, t_d) \in \mathbb{R}^d$ . For  $n$  large enough, we can expect  $|\phi_K|$  to be well approximated by  $(\#\mathcal{D})|\phi_\gamma|$ . The last part of (B.4) reflects this property.

We assume too that the linear transformations  $Q_\theta$  and  $R$  have the following symmetry and Hölder continuity properties:

$$\begin{aligned}
& \text{(a) the Fourier transforms } \phi_{\omega_{Q_\theta}} \text{ and } \phi_{\omega_R} \text{ are real-valued; (b) the functional } |\phi_{\omega_{Q_\theta}}| \text{ satisfies } \sup_{t \in \mathcal{T}} |\phi_{\omega_R}(t)^2 |\phi_{\omega_{Q_\theta}}(t)|^{-2} - \phi_{\omega_{Q_{\theta'}}}(t)^{-2}| \leq C_4 n^{C_5} \|\theta - \theta'\|^{c_2}, \text{ uniformly in } \theta, \theta' \in \Theta; \text{ (c) for all sufficiently large } n, \\
& \int_{\mathcal{T}} |\phi_K|^2 |\phi_{\omega_R}|^4 |\phi_{\omega_{Q_\theta}}|^{-4} \geq C_6 (\#\mathcal{D})^2 q; \text{ (d) for all sufficiently large } n, \\
& \int_{\mathcal{T}} |\phi_K|^2 |\phi_{\omega_R}|^2 |\phi_{\omega_{Q_\theta}}|^{-2} \geq C_7 \sigma_n^2 (\#\mathcal{D}) q.
\end{aligned} \tag{B.5}$$

Property (B.5)(a) asks that the functions  $\omega_{Q_\theta}$  and  $\omega_R$  be symmetric. A longer proof can deal with cases of asymmetry, but symmetric models would almost always be used in practice. Condition (B.5)(b) asks that  $Q_\theta$  and  $R$  satisfy a Hölder continuity condition in  $\theta$ ; in view of the factor  $n^{C_5}$ , and since  $c_2$  can be arbitrarily small, it is quite mild. Properties (B.5)(c) and (B.5)(d) reflect the fact that  $|\phi_K| \approx (\#\mathcal{D}) |\phi_\gamma|$ , as noted below (B.4).

We expect the transformation  $Q_\theta$  to be reasonably close to  $R$ , and the following assumption responds to that property:

$$\begin{aligned}
& \text{(a) } \sup_{r \in \mathcal{D}} \sup_{\theta \in \Theta} |\omega_{R^2 Q_\theta^{-2}}(r)| \leq C_7; \text{ (b) the quantity } q, \text{ at (B.1), satisfies } \\
& n^{-c_3} \leq q \leq n^{c_4} \text{ for all sufficiently large } n, \text{ where } 0 < c_3 < 2d, 0 < c_4 < c_1 \\
& \text{and } c_1 \text{ is as in (B.3).}
\end{aligned} \tag{B.6}$$

Here  $\omega_{R^2 Q_\theta^{-2}}$  is the spread function associated with  $R^2 Q_\theta^{-2}$ , that is

$$R^2 Q_\theta^{-2} \zeta(r) = \sum_{s \in \mathbb{Z}} \omega_{R^2 Q_\theta^{-2}}(s) \zeta(r + s).$$

We conclude with an example illustrating (B.5) and (B.6). Let  $p_0$  be the probability mass function at (2.5) and let  $Q_\theta$  denote the corresponding transformation, with associated Fourier transform  $\phi_{\omega_{Q_\theta}}$  at (2.9). Then there exists  $\rho_0 \in (0, 1)$  and  $D_0 \in (0, 1)$  such that  $D_0^d \leq \phi_{\omega_{Q_\theta}}(t; \rho) \leq D_0^{-d}$  for all  $t \in (-\pi, \pi)$  and all  $|\rho| \leq \rho_0$ . Put  $\Theta = [-\rho_0, \rho_0]$ , let  $\theta_0 \in \Theta$ , and let  $R$  be the transformation  $Q_{\theta_0}$ . Then  $|\phi_{\omega_R}(t)| |\phi_{\omega_{Q_\theta}}(t)|^{-1}$  is bounded away from zero and infinity uniformly in  $t \in (-\pi, \pi)^d$  and in  $\rho \in \Theta$ , so (B.5)(c) and (B.5)(d) reduce to the assumption that  $\int_{\mathcal{T}} |\phi_K|^2 \geq C (\#\mathcal{D})^2$ , for some constant  $C > 0$ . That this condition holds for general choices of  $K$  follows from the fact that, in such cases,  $\phi_K \approx (\#\mathcal{D}) \phi_\gamma$  for a conventional, continuous Fourier transform  $\phi_\gamma$ ; see the argument below (3.4). Moreover, by taking the inverse Fourier transform we deduce that (B.6)(a) holds. Note too that these results are valid when  $\mathcal{T} = (-\pi, \pi)^d$  and no smoothing is used.

## B.2 Proof of Theorem 1

### B.2.1 Step 1: Derivation of simpler criterion for classifier

The simpler criterion is at (B.8) below. To derive it, put  $\bar{Y}_j = n_j^{-1} \sum_k Y_{kj}$  and let  $\bar{Z}_{j;\theta}(r)$  be as defined immediately below (3.1). The Fourier transforms of  $Y$  and  $\bar{Y}_j$  are, by (2.6),

$$\phi_Y(t) = \sum_{r \in \mathbb{Z}^d} Y(r) \exp(i r^T t), \quad \phi_{\bar{Y}_j}(t) = n_j^{-1} \sum_{k=1}^{n_j} \sum_{r \in \mathbb{Z}^d} Y_{kj}(r) \exp(i r^T t).$$

Likewise, the Fourier transform of  $Z_\theta(r) - \bar{Z}_{j;\theta}(r)$  equals

$$\{\phi_Y(t) - \phi_{\bar{Y}_j}(t)\} \phi_{\omega_{Q_\theta}}(t)^{-1} I(t \in \mathcal{T}).$$

Therefore, since by (3.6)  $Z_\theta$  is supported on  $\mathcal{D}$ , then by Parseval's identity,

$$\sum_{r \in \mathcal{D}} |Z_\theta(r) - \bar{Z}_{j;\theta}(r)|^2 = (2\pi)^{-d} \int_{\mathcal{T}} |\phi_Y - \phi_{\bar{Y}_j}|^2 |\phi_{\omega_{Q_\theta}}|^{-2},$$

and so the classifier represented by (3.1) is given equivalently by the algorithm: Assign  $Y$  to  $\Pi_1$  if and only if

$$D(\theta) \equiv \int_{\mathcal{T}} |\phi_Y - \phi_{\bar{Y}_2}|^2 |\phi_{\omega_{Q_\theta}}|^{-2} - \int_{\mathcal{T}} |\phi_Y - \phi_{\bar{Y}_1}|^2 |\phi_{\omega_{Q_\theta}}|^{-2} > 0. \quad (\text{B.7})$$

Write  $E$  for the expectation operator, put  $\nu_j = T\mu_j$ , write  $\nu$  for the expected value of  $Y$  when the latter is drawn from one or other of  $\Pi_1$  and  $\Pi_2$ , and put  $\phi_\Delta = (1 - E)\phi_Y$  and  $\phi_{\Delta_j} = (1 - E)\phi_{\bar{Y}_j}$ , for  $j = 1, 2$ . Then,

$$\begin{aligned} D(\theta) &= \int_{\mathcal{T}} \left[ |\phi_{\nu-\nu_2}|^2 - |\phi_{\nu-\nu_1}|^2 + |\phi_{\Delta-\Delta_2}|^2 - |\phi_{\Delta-\Delta_1}|^2 \right. \\ &\quad \left. + 2 \left\{ \Re \phi_{\nu-\nu_2} \Re \phi_{\Delta-\Delta_2} + \Im \phi_{\nu-\nu_2} \Im \phi_{\Delta-\Delta_2} \right. \right. \\ &\quad \left. \left. - \Re \phi_{\nu-\nu_1} \Re \phi_{\Delta-\Delta_1} - \Im \phi_{\nu-\nu_1} \Im \phi_{\Delta-\Delta_1} \right\} \right] |\phi_{\omega_{Q_\theta}}|^{-2} \\ &= D_1(\theta) + D_2(\theta) + 2 \{D_{32}(\theta) - D_{31}(\theta)\} - 2 \{D_{42}(\theta) - D_{41}(\theta)\}, \end{aligned} \quad (\text{B.8})$$

where

$$\begin{aligned} D_1(\theta) &= \int_{\mathcal{T}} \left\{ |\phi_{\nu-\nu_2}|^2 - |\phi_{\nu-\nu_1}|^2 \right\} |\phi_{\omega_{Q_\theta}}|^{-2}, \\ D_2(\theta) &= \int_{\mathcal{T}} \left\{ |\phi_{\Delta-\Delta_2}|^2 - |\phi_{\Delta-\Delta_1}|^2 \right\} |\phi_{\omega_{Q_\theta}}|^{-2}, \end{aligned}$$

$$\begin{aligned}
D_{3j}(\theta) &= \int_{\mathcal{T}} \left\{ \Re \phi_{\nu-\nu_j} \Re \phi_{\Delta} + \Im \phi_{\nu-\nu_j} \Im \phi_{\Delta} \right\} |\phi_{\omega_{Q_\theta}}|^{-2}, \\
D_{4j}(\theta) &= \int_{\mathcal{T}} \left\{ \Re \phi_{\nu-\nu_j} \Re \phi_{\Delta_j} + \Im \phi_{\nu-\nu_j} \Im \phi_{\Delta_j} \right\} |\phi_{\omega_{Q_\theta}}|^{-2}.
\end{aligned}$$

### B.2.2 Step 2. Formula for $D_1(\theta)$ and bound for $D_2(\theta)$

To simplify  $D_1(\theta)$  take, for instance,  $\nu = \nu_1$  and observe that, by (B.4),

$$\int_{\mathcal{T}} |\phi_{\nu_1-\nu_2}|^2 |\phi_{\omega_{Q_\theta}}|^{-2} = \alpha_n^2 \int_{\mathcal{T}} |\phi_K|^2 |\phi_{\omega_R}|^2 |\phi_{\omega_{Q_\theta}}|^{-2}. \quad (\text{B.9})$$

To bound  $D_2(\theta)$ , in a slight modification of the notation at (2.3) we write  $\bar{Y}_j = \nu_j + R(\bar{\xi}_j)$  and  $Y = \nu + R(\xi)$ , where  $\bar{\xi}_j = n_j^{-1} \sum_i \xi_{ji}$ , and the random vectors  $\xi_{ji}$  (for  $1 \leq i \leq n_j$  and  $j = 1, 2$ ) and  $\xi$  are independent and identically distributed white noise; see (B.2). In this notation,  $\Delta = R(\xi)$ ,  $\Delta_j = R(\bar{\xi}_j)$ ,

$$\phi_{\Delta} = \phi_{\xi} \phi_{\omega_R}, \quad \phi_{\Delta_j} = \phi_{\bar{\xi}_j} \phi_{\omega_R}, \quad (\text{B.10})$$

where, using (3.6),

$$\phi_{\xi}(t) = \sum_{r \in \mathcal{D}} \xi(r) \exp(ir^T t), \quad \phi_{\bar{\xi}_j}(t) = \sum_{r \in \mathcal{D}} \bar{\xi}_j(r) \exp(ir^T t). \quad (\text{B.11})$$

Also,

$$\begin{aligned}
\beta(t) &\equiv |\phi_{\Delta-\Delta_2}|^2 - |\phi_{\Delta-\Delta_1}|^2 \\
&= \Re \phi_{\Delta_1-\Delta_2} \Re \phi_{2\Delta-\Delta_1-\Delta_2} + \Im \phi_{\Delta_1-\Delta_2} \Im \phi_{2\Delta-\Delta_1-\Delta_2}.
\end{aligned} \quad (\text{B.12})$$

Defining

$$q_0(t) = |\phi_{\omega_R}(t)|^2 \sup_{\theta \in \Theta} |\phi_{\omega_{Q_\theta}}(t)|^{-2}, \quad (\text{B.13})$$

we deduce from (B.10)–(B.12) that, uniformly in  $\theta \in \Theta$ ,

$$\begin{aligned}
\frac{1}{2} |D_2(\theta)| &\leq \frac{1}{2} \int_{\mathcal{T}} |\beta| |\phi_{\omega_{Q_\theta}}|^{-2} \\
&\leq \int_{\mathcal{T}} |\phi_{\Delta_1-\Delta_2}| |\phi_{2\Delta-\Delta_1-\Delta_2}| |\phi_{\omega_{Q_\theta}}|^{-2} \\
&\leq \int_{\mathcal{T}} |\phi_{\bar{\xi}_1-\bar{\xi}_2}| |\phi_{2\xi-\bar{\xi}_1-\bar{\xi}_2}| q_0 \\
&\leq \left\{ \int_{\mathcal{T}} |\phi_{\bar{\xi}_1-\bar{\xi}_2}|^2 q_0 \right\}^{1/2} \left\{ \int_{\mathcal{T}} |\phi_{2\xi-\bar{\xi}_1-\bar{\xi}_2}|^2 q_0 \right\}^{1/2},
\end{aligned} \quad (\text{B.14})$$

and moreover,

$$\sup_{t \in \mathcal{T}} E|\phi_{\xi_j}(t)|^2 \leq n_j^{-1} \sigma_n^2 \#\mathcal{D}, \quad \sup_{t \in \mathcal{T}} E|\phi_{\xi}(t)|^2 \leq \sigma_n^2 \#\mathcal{D}. \quad (\text{B.15})$$

Therefore, noting that  $q$  at (B.1), and  $q_0$  at (B.13), satisfy  $\int_{\mathcal{T}} q_0 \leq \{(2\pi)^d q\}^{1/2}$  where the latter bound follows from the Cauchy-Schwarz inequality, we have:

$$\sup_{\theta \in \Theta} |D_2(\theta)| = O_p(\sigma_n^2 n_{\min}^{-1/2} q \#\mathcal{D}). \quad (\text{B.16})$$

### B.2.3 Step 3: Formula for $D_{3j}(\theta)$

As in step 2 we take  $\nu = \nu_1$ , in which case  $D_{31} \equiv 0$  and

$$D_{32}(\theta) = \int_{\mathcal{T}} \left\{ \Re \phi_{\nu_1 - \nu_2} \Re \phi_{\Delta} + \Im \phi_{\nu_1 - \nu_2} \Im \phi_{\Delta} \right\} |\phi_{\omega_{Q_{\theta}}}|^{-2}. \quad (\text{B.17})$$

Using the fact that  $\phi_{\omega_R}$  is real-valued and letting  $a^*$  denote the complex conjugate of a complex number  $a$ , it can be deduced from (B.10), and the property  $\phi_{\nu_1 - \nu_2} = \alpha_n \phi_{\omega_R} \phi_K$  in (B.4), that

$$\begin{aligned} & \alpha_n^{-1} \left[ \Re \{ \phi_{\nu_1 - \nu_2}(t) \} \Re \{ \phi_{\Delta}(t) \} + \Im \{ \phi_{\nu_1 - \nu_2}(t) \} \Im \{ \phi_{\Delta}(t) \} \right] \\ &= \Re \{ \phi_K(t) \phi_{\omega_R}(t)^2 \phi_{\xi}^*(t) \} \\ &= \phi_{\omega_R}(t)^2 \left[ \left\{ \sum_{r \in \mathcal{D}} K(r) \cos(r^T t) \right\} \left\{ \sum_{r \in \mathcal{D}} \xi(r) \cos(r^T t) \right\} \right. \\ & \quad \left. + \left\{ \sum_{r \in \mathcal{D}} K(r) \sin(r^T t) \right\} \left\{ \sum_{r \in \mathcal{D}} \xi(r) \sin(r^T t) \right\} \right] \\ &= \phi_{\omega_R}(t)^2 \sum_{r_1 \in \mathcal{D}} \sum_{r_2 \in \mathcal{D}} K(r_1) \xi(r_2) \cos \{ (r_1 - r_2)^T t \}. \end{aligned}$$

Therefore,

$$\begin{aligned} & (2\pi)^{-d} \alpha_n^{-1} \int_{\mathcal{T}} \left\{ \Re \phi_{\nu_1 - \nu_2} \Re \phi_{\Delta} + \Im \phi_{\nu_1 - \nu_2} \Im \phi_{\Delta} \right\} |\phi_{\omega_{Q_{\theta}}}|^{-2} \\ &= (2\pi)^{-d} \sum_{r_1 \in \mathcal{D}} \sum_{r_2 \in \mathcal{D}} K(r_1) \xi(r_2) \int_{\mathcal{T}} \cos \{ (r_1 - r_2)^T t \} \phi_{\omega_R}(t)^2 |\phi_{\omega_{Q_{\theta}}}(t)|^{-2} dt \\ &= \sum_{r_1 \in \mathcal{D}} \sum_{r_2 \in \mathcal{D}} K(r_1) \xi(r_2) \omega_{R^2 Q_{\theta}^{-2}}(r_1 - r_2) \equiv Z_1(\theta), \end{aligned} \quad (\text{B.18})$$

say. Note too that, defining  $A$  to be  $\omega_{R^2 Q_\theta^{-2}}$ , the spread function associated with the transform  $R^2 Q_\theta^{-2}$ , we have:

$$\begin{aligned}\tau(\theta)^2 &\equiv \text{var}\{Z_1(\theta)\} = \sigma_n^2 \sum_{r_2} \left\{ \sum_{r_1} K(r_1) A(r_1 - r_2) \right\}^2 \\ &= (2\pi)^{-d} \sigma_n^2 \int_{\mathcal{T}} |\phi_K|^2 |\phi_{\omega_R}|^4 |\phi_{\omega_{Q_\theta}}|^{-4}.\end{aligned}\quad (\text{B.19})$$

Defining  $Z(\theta) = Z_1(\theta)/\tau(\theta)$ , we deduce from (B.17) and (B.18) that, for all  $\theta \in \Theta$ ,

$$D_{32}(\theta) = (2\pi)^d \alpha_n Z(\theta) \tau(\theta). \quad (\text{B.20})$$

#### B.2.4 Step 4: Bound for $D_{4j}(\theta)$

Again we take  $\nu = \nu_1$ , implying that  $D_{41} \equiv 0$  and

$$D_{42}(\theta) = (2\pi)^d \alpha_n A_2(\theta) \quad (\text{B.21})$$

where

$$\begin{aligned}A_j(\theta) &= (2\pi)^{-d} \alpha_n^{-1} \int_{\mathcal{T}} \left\{ \Re \phi_{\nu_1 - \nu_2} \Re \phi_{\Delta_j} + \Im \phi_{\nu_1 - \nu_2} \Im \phi_{\Delta_j} \right\} |\phi_{\omega_{Q_\theta}}|^{-2} \\ &= (2\pi)^{-d} \int_{\mathcal{T}} \Re(\phi_K \phi_{\xi_j}^*) |\phi_{\omega_R}|^2 |\phi_{\omega_{Q_\theta}}|^{-2}.\end{aligned}\quad (\text{B.22})$$

The arguments leading to (B.18) and (B.19) imply that

$$A_j(\theta) = \sum_{r_1 \in \mathcal{D}} \sum_{r_2 \in \mathcal{D}} K(r_1) \bar{\xi}_j(r_2) \omega_{R^2 Q_\theta^{-2}}(r_1 - r_2), \quad (\text{B.23})$$

$$\text{var}\{A_j(\theta)\} = (2\pi)^{-d} \sigma_n^2 n_j^{-1} \int_{\mathcal{T}} |\phi_K|^2 |\phi_{\omega_R}|^4 |\phi_{\omega_{Q_\theta}}|^{-4}. \quad (\text{B.24})$$

Result (B.24) and assumption (B.4) imply that, with  $q$  defined as at (B.1),

$$\sup_{\theta \in \Theta} \text{var}\{A_j(\theta)\} \leq C_3^2 \sigma_n^2 n_j^{-1} q (\#\mathcal{D})^2. \quad (\text{B.25})$$

Rosenthal's inequality implies that if  $k \geq 1$  is an integer, and if  $B_1(k) = E|\xi(r)/\sigma_n|^{2k}$  (a constant; see (B.2)(b)), then, for a constant  $B_2(k)$  depending only on  $k$ , and with  $B_3(k) = B_2(k) \{1 + B_1(k)\}$ ,

$$E\{\bar{\xi}_j(r_2)^{2k}\} \leq B_2(k) \sigma_n^{2k} \{n_j^{-k} + n_j^{1-2k} B_1(k)\} \leq B_3(k) \sigma_n^{2k} n_j^{-k}. \quad (\text{B.26})$$



The bound  $\sup_{r \in \mathcal{D}} |K(r)| \leq C_2$  in (B.4), and  $\sup_{r \in \mathcal{D}} \sup_{\theta \in \Theta} |\omega_{R^2 Q_\theta^{-2}}(r)| \leq C_7$  in (B.6)(a), imply that

$$\sum_{r_1 \in \mathcal{D}} \sum_{r_2 \in \mathcal{D}} |K(r_1) \omega_{R^2 Q_\theta^{-2}}(r_1 - r_2)|^{2k} E\{\bar{\xi}_j(r_2)^{2k}\} \leq (\#\mathcal{D})^2 (C_2 C_7)^{2k} B_3(k) \sigma_n^{2k} n_j^{-k}. \quad (\text{B.27})$$

Property (B.23) expresses  $A_j(\theta)$  as a sum of independent random variables, and hence, for any integer  $k \in (1, \frac{1}{2} C_1]$  where  $C_1$  is as in (B.2)(b), we can use Rosenthal's inequality again, together with (B.23) and (B.25)–(B.27), to show that

$$\begin{aligned} E|A_j(\theta)|^{2k} &\leq B_2(k) \left[ \{\text{var} A_j(\theta)\}^k \right. \\ &\quad \left. + \sum_{r_1 \in \mathcal{D}} \sum_{r_2 \in \mathcal{D}} |K(r_1) \omega_{R^2 Q_\theta^{-2}}(r_1 - r_2)|^{2k} E\{\bar{\xi}_j(r_2)^{2k}\} \right] \\ &\leq B_4(k) \left[ \{\sigma_n^2 n_j^{-1} q (\#\mathcal{D})^2\}^k + (\#\mathcal{D})^2 (\sigma_n^2 n_j^{-1})^k \right] \\ &\leq B_5(k) \{\sigma_n^2 n_j^{-1} q (\#\mathcal{D})^2\}^k, \end{aligned} \quad (\text{B.28})$$

where  $q$  is as at (B.1) and the last inequality holds if  $k$  (and hence  $C_1$  in (B.2)(b)) is taken sufficiently large. To obtain the last inequality in (B.28), we used the lower bound  $n^{-c_3} \leq q$  (where  $c_3 < 2d$ ) in (B.6)(b) to ensure that  $(\#\mathcal{D})^2 (\sigma_n^2 n_j^{-1})^k = O[\{\sigma_n^2 n_j^{-1} q (\#\mathcal{D})^2\}^k]$  for sufficiently large  $k$ . The argument here requires  $c_3 \leq 2d(1 - k^{-1})$ .

By (B.3) and (B.6)(b),  $n_j^{-1}(q+1) \leq n_{\min}^{-1}(q+1) = O(n^{-(c_1 - c_4)})$ , where  $c_4$  is as in (B.6)(b) and  $c \equiv c_1 - c_4 > 0$ . Hence, by (B.28) and Markov's inequality,

$$\sup_{\theta \in \Theta} P\{|A_j(\theta)| > \epsilon \sigma_n n_{\min}^{-1/2} q^{1/2} \#\mathcal{D}\} \leq B_6(k) (\epsilon n^c)^{-k}$$

for all  $\epsilon > 0$ . Therefore, if  $\Theta_n \subseteq \Theta$  satisfies

$$\#\Theta_n = o(n^{kc}) \quad (\text{B.29})$$

then, for all  $\epsilon > 0$ ,

$$P\left\{ \sup_{\theta \in \Theta_n} |A_j(\theta)| > \epsilon \sigma_n n_{\min}^{-1/2} q^{1/2} \#\mathcal{D} \right\} \rightarrow 0. \quad (\text{B.30})$$

Recall that  $\Theta$  is a compact subset of a finite-dimensional Euclidean space. Given  $B_6 > 0$  we can choose  $B_7 > 0$ , depending on  $B_6$  and on  $C_5$  and  $c_2$  in (B.5)(b), so large that for all sufficiently large  $n$  there exists a set  $\Theta_n \subseteq \Theta$  such that (B.29) holds if  $k$  is chosen sufficiently

large (i.e. if  $C_1$  in (B.2)(b) is taken sufficiently large), and the following property obtains: if  $\theta' \in \Theta_n$  denotes the value nearest to  $\theta \in \Theta$  then

$$\sup_{t \in \mathcal{T}} \phi_{\omega_R}(t)^2 |\phi_{\omega_{Q_\theta}}(t)^{-2} - \phi_{\omega_{Q_{\theta'}}}(t)^{-2}| \leq n^{-B_7}.$$

This bound, together with (B.22), implies that, with  $C_3$  as in (B.4),

$$\begin{aligned} \sup_{\theta \in \Theta} |A_j(\theta) - A_j(\theta')| &\leq (2\pi)^{-d} n^{-B_7} \int_{\mathcal{T}} |\Re(\phi_K \phi_{\xi_j}^*)| \\ &\leq (2\pi)^{-d} C_3 (\#\mathcal{D}) n^{-B_7} \int_{\mathcal{T}} |\phi_{\xi_j}| \\ &= O_p\{\sigma_n n_j^{-1/2} n^{-B_7} (\#\mathcal{D})^{3/2}\}, \end{aligned} \quad (\text{B.31})$$

where the last identity follows from the bound  $\int_{\mathcal{T}} |\phi_{\xi_j}| = O_p\{\sigma_n n_j^{-1/2} (\#\mathcal{D})^{1/2}\}$ . Since  $\#\mathcal{D} = O(n^d)$  (see the definition (3.4) of  $\mathcal{D}$ , and the first paragraph of this section) then, by taking  $B_7$  sufficiently large, we can deduce from (B.30) and (B.31) that

$$\sup_{\theta \in \Theta} |A_j(\theta)| = O_p(\sigma_n n_{\min}^{-1/2} q^{1/2} \#\mathcal{D}). \quad (\text{B.32})$$

Together, (B.21) and (B.32) imply that

$$\sup_{\theta \in \Theta} |D_{42}(\theta)| = O_p(\alpha_n \sigma_n n_{\min}^{-1/2} q^{1/2} \#\mathcal{D}). \quad (\text{B.33})$$

### B.2.5 Step 5: Formula for classification error

Combining (B.8), (B.9), (B.16), (B.19), (B.20) and (B.33), and bearing in mind that these properties were derived under the assumption that the new variable  $Y$  came from population  $\Pi_1$  (that is,  $\nu = \nu_1$ ), we deduce that when  $Y$  comes from  $\Pi_1$ ,

$$\begin{aligned} D(\theta) &= \alpha_n^2 \int_{\mathcal{T}} |\phi_K|^2 |\phi_{\omega_R}|^2 |\phi_{\omega_{Q_\theta}}|^{-2} + \alpha_n \sigma_n \left\{ (2\pi)^d \int_{\mathcal{T}} |\phi_K|^2 |\phi_{\omega_R}|^4 |\phi_{\omega_{Q_\theta}}|^{-4} \right\}^{1/2} Z(\theta) \\ &\quad + O_p\left(\sigma_n^2 n_{\min}^{-1/2} q \#\mathcal{D} + \alpha_n \sigma_n n_{\min}^{-1/2} q^{1/2} \#\mathcal{D}\right), \end{aligned} \quad (\text{B.34})$$

uniformly in  $\theta \in \Theta$ .

The random variable  $Z(\theta)$  in (B.34) has, by construction (see (B.19) and the line above (B.20)), zero mean and unit variance. We shall use Lindeberg's central limit theorem to prove that  $Z(\theta)$  is asymptotically normal  $N(0, 1)$ . In view of (B.2), (B.18) and (B.19), to establish

that Lindeberg's condition (see e.g. Chung 1974, p. 205) holds uniformly in  $\theta \in \Theta$  it suffices to prove that for some  $k > 0$ , and with  $P = \omega_{R^2} Q_\theta^{-2}$ ,

$$\sup_{\theta \in \Theta} \frac{\sum_{r_2 \in \mathcal{D}} |\sum_{r_1 \in \mathcal{D}} K(r_1) P(r_1 - r_2)|^{k+2}}{\left\{ \int_{\mathcal{T}} |\phi_K|^2 |\phi_{\omega_R}|^4 |\phi_{\omega_{Q_\theta}}|^{-4} \right\}^{(k+2)/2}} \rightarrow 0 \quad (\text{B.35})$$

as  $n \rightarrow \infty$ . Now,

$$\begin{aligned} \left| \sum_{r_1 \in \mathcal{D}} K(r_1) P(r_1 - r_2) \right|^2 &\leq \left\{ \sum_{r \in \mathcal{D}} K(r)^2 \right\} \left\{ \sum_{r \in \mathbb{Z}^d} P(r)^2 \right\} \\ &\leq C_2^2 (\#\mathcal{D}) (2\pi)^d \int_{\mathcal{T}} |\phi_{\omega_R}|^4 |\phi_{\omega_{Q_\theta}}|^{-4} \\ &= C_2^2 (2\pi)^d (\#\mathcal{D}) q = B_8 (\#\mathcal{D})^{-1} \cdot (\#\mathcal{D})^2 q \\ &\leq B_9 (\#\mathcal{D})^{-1} \int_{\mathcal{T}} |\phi_K|^2 |\phi_{\omega_R}|^4 |\phi_{\omega_{Q_\theta}}|^{-4}, \end{aligned} \quad (\text{B.36})$$

where  $C_2$  is as in (B.4),  $B_8$  and  $B_9$  do not depend on  $\theta$ , and the final inequality in (B.36) follows from (B.5)(c). Hence, the left-hand side of (B.35) is bounded above by  $B_9 (\#\mathcal{D})^{1-(k+2)/2}$ , which converges to zero if  $k > 0$ . It can be proved from this property that the following uniform version of the central limit theorem holds:

$$\sup_{\theta \in \Theta} \sup_{-\infty < x < \infty} |P\{Z(\theta) \leq x\} - \Phi(x)| \rightarrow 0. \quad (\text{B.37})$$

Note that, in view of (B.5)(c), the multiplier of  $Z(\theta)$  on the right-hand side of (B.34) is bounded below by a constant multiple of  $\alpha_n \sigma_n q^{1/2} \#\mathcal{D}$ , and so is of strictly larger order than the remainder term  $O_p(\alpha_n \sigma_n n_{\min}^{-1/2} q^{1/2} \#\mathcal{D})$  in (B.34); and, by (B.5)(d), the first term on the right-hand side of (B.34) is bounded below by a constant multiple of  $\sigma_n^2 q \#\mathcal{D}$ , and so is of strictly larger order than the remainder term  $O_p(\sigma_n^2 n_{\min}^{-1/2} q \#\mathcal{D})$  in (B.34). Combining the results in the previous sentence with (B.34) and (B.37) we deduce that, uniformly in  $\theta \in \Theta$ ,

$$\begin{aligned} D(\theta) &= \{1 + o_p(1)\} \alpha_n^2 \int_{\mathcal{T}} |\phi_K|^2 |\phi_{\omega_R}|^2 |\phi_{\omega_{Q_\theta}}|^{-2} \\ &\quad + \{1 + o_p(1)\} \alpha_n \sigma_n \left\{ (2\pi)^d \int_{\mathcal{T}} |\phi_K|^2 |\phi_{\omega_R}|^4 |\phi_{\omega_{Q_\theta}}|^{-4} \right\}^{1/2} Z(\theta). \end{aligned} \quad (\text{B.38})$$

Together, (B.37) and (B.38) imply that, with  $u_n$  defined as at (3.7), we have:

$$\sup_{\theta \in \Theta} |P\{D(\theta) < 0 \mid Y \in \Pi_1\} - \Phi(-u_n)| \rightarrow 0$$

as  $n \rightarrow \infty$ , and similarly,

$$\sup_{\theta \in \Theta} |P\{D(\theta) > 0 \mid Y \in \Pi_2\} - \Phi(-u_n)| \rightarrow 0.$$

This establishes (3.8).

### B.3 Proof of Theorem 2

Formula (B.38), for  $D(\theta)$  defined at (B.7), remains correct if we interpret it as applying in the case where  $Y$  is drawn from the training sample  $\mathcal{Y}_1$ , and if we regard  $Z(\theta)$  as being computed from this particular  $Y$ . (Recall that  $Z(\theta)$  is calculated from  $Y$  alone; it has no dependence on  $\mathcal{Y}$ .) Suppose we can extend (B.38) so that it applies not just to one such choice of  $Y$ , but uniformly over all  $n_1$  such choices, giving values  $(D_{[\ell]}(\theta), Z_\ell(\theta))$ , for  $1 \leq \ell \leq n_1$ , of the pairs  $(D(\theta), Z(\theta))$ . Here  $n_1$  is reduced to  $n_1 - 1$ , but  $n_2$  remains unchanged, and we have

$$\begin{aligned} D_{[\ell]}(\theta) &= \{1 + o_p(1)\} \alpha_n^2 \int_{\mathcal{T}} |\phi_K|^2 |\phi_{\omega_R}|^2 |\phi_{\omega_{Q_\theta}}|^{-2} \\ &\quad + \{1 + o_p(1)\} \alpha_n \sigma_n \left\{ (2\pi)^d \int_{\mathcal{T}} |\phi_K|^2 |\phi_{\omega_R}|^4 |\phi_{\omega_{Q_\theta}}|^{-4} \right\}^{1/2} Z_\ell(\theta), \end{aligned} \quad (\text{B.39})$$

where the  $o_p(1)$  remainders are of the stated orders uniformly in  $1 \leq \ell \leq n_1$  as well as in  $\theta \in \Theta$ .

Computing the indicator function  $I\{D_{[\ell]}(\theta) > 0\}$  on the left-hand side of (B.39), averaging over  $\ell$ , and applying a law of large numbers for the sum over  $\ell = 1, \dots, n_1$  of the independent random variables  $I\{Z_\ell(\theta) > u_n\}$ , we obtain:

$$\frac{1}{n_1} \sum_{\ell=1}^{n_1} I\{D_{[\ell]}(\theta) > 0\} = \Phi(-u_n) + o_p(1),$$

uniformly in  $\theta \in \Theta$ . Multiplying this by  $\pi_1$ , computing its counterpart when  $Y$  is drawn from  $\mathcal{Y}_2$  rather than  $\mathcal{Y}_1$ , and adding them together, we obtain exactly, on the left-hand side,  $\widehat{e}(\theta)$ , and on the right-hand side,  $1 - \Phi(u_n) + o_p(1)$ , uniformly in  $\theta \in \Theta$ . This is equivalent to (3.9) and so completes the proof of Theorem 2.

It remains to verify that (B.39) holds uniformly in  $1 \leq \ell \leq n_1$  and  $\theta \in \Theta$ . In describing how this is done we refer to formula (B.8) for  $D(\theta)$ , taking a subscript  $\ell$  (given above in square brackets, so as not to cause confusion with notation below (B.8)) to be understood.

The quantity  $D_1(\theta)$  does not alter, and the bound (B.14) for  $\frac{1}{2}|D_2(\theta)|$  remains valid except that the pair  $(\xi, \bar{\xi}_1)$  now has  $n_1$  different versions  $(\xi_\ell, \bar{\xi}_{1\ell})$  say, each producing its own  $D_2(\theta)$ . (There is only one version of  $\bar{\xi}_2$ .) However, using Parseval's inequality to bound  $E|\phi_{\xi_\ell}|^{2k}$  and  $E|\phi_{\bar{\xi}_{1\ell}}|^{2k}$  for any  $k \geq 1$ , and noting that (B.2)(b) permits us to take  $k$  as large as needed, we obtain:

$$E\left\{\max_{1 \leq \ell \leq n_1} |\phi_{\bar{\xi}_{1\ell}}(t)|^2\right\} \leq \left[E\left\{\sum_{\ell=1}^{n_1} |\phi_{\bar{\xi}_{1\ell}}(t)|^{2k}\right\}\right]^{1/k} = n_1^{1/k} \{E|\phi_{\bar{\xi}_{11}}(t)|^{2k}\}^{1/k} = O(n_1^{-(k-1)/k} \sigma_n^2 \#\mathcal{D}),$$

uniformly in  $t \in \mathcal{T}$ . This bound replaces the first part of (B.15), and the second part of (B.15) can similarly be replaced by  $O(n_1^{1/k} \sigma_n^2 \#\mathcal{D})$ . This argument shows that (B.16) continues to hold, this time uniformly over all leave-one-out cases, provided we replace  $n_{\min}^{-1/2}$  on the right-hand side by  $n_{\min}^{\epsilon-(1/2)}$ , where  $\epsilon > 0$  can be made as small as we like by choosing  $C_1$ , in (B.2)(a), sufficiently large. That change to (B.16) requires us to replace  $n_{\min}^{-1/2}$  by  $n_{\min}^{\epsilon-(1/2)}$  in the  $O_p(\sigma_n^2 n_{\min}^{-1/2} q \#\mathcal{D})$  term on the right-hand side of (B.34), but this alteration does not influence any of the subsequent arguments in step 5.

The term  $D_{3j}(\theta)$ , which depends only on  $Y$  (or, in the present circumstance, on an observation drawn from  $\mathcal{Y}_1$ ) can be dealt with exactly as before. Moreover, an upper bound to  $|D_{4j}(\theta)|$  can be derived, uniformly over all leave-one-out choices, by following the argument given in the previous paragraph for  $D_2(\theta)$ . In this way it can be proved that the contribution made by  $D_{4j}(\theta)$  to  $D(\theta)$  can be accommodated in the  $\alpha_n \sigma_n n_{\min}^{-1/2} q^{1/2} \#\mathcal{D}$  remainder term in (B.34), provided that  $n_{\min}^{-1/2}$  on the right-hand side is replaced by  $n_{\min}^{\epsilon-(1/2)}$ , again for arbitrarily small  $\epsilon > 0$  and uniformly over all leave-one-out cases; and that this has no bearing on later arguments in step 5.

## Additional References

Chung, K. L. (1974), *A Course in Probability Theory* (2nd ed.), New York: Academic Press.
